# Supplementary material
Source: publisher site journal article supplement (http://kjim.org/upload/media/kjim-2023-133-Supplementary-Table-2.pdf)
Supplement: Supplementary file 1 [file kjim-2023-133-Supplementary-Table-2.pdf]

**Supplementary Table 2. Comparison of survey results according to respondents' years of practice**

| Variable                                                                                   | Years of practice |              |              |              | p value |
|--------------------------------------------------------------------------------------------|-------------------|--------------|--------------|--------------|---------|
|                                                                                            | < 5               | 5–9          | 10–14        | ≥ 15         |         |
| Need for antibiotic treatment in uncomplicated diverticulitis (n = 193)                    |                   |              |              |              | 0.067   |
| Yes                                                                                        | 26/28 (92.9)      | 40/51 (78.4) | 39/42 (92.9) | 66/72 (91.7) |         |
| No                                                                                         | 2/28 (7.1)        | 11/51 (21.6) | 3/42 (7.1)   | 6/72 (8.3)   |         |
| Suggested duration of antibiotic treatment, d (n = 185)                                    |                   |              |              |              | 0.012   |
| ≤ 1                                                                                        | 0/28 (0.0)        | 0/46 (0.0)   | 1/42 (2.4)   | 0/69 (0.0)   |         |
| 2–3                                                                                        | 2/28 (7.1)        | 1/46 (2.2)   | 3/42 (7.1)   | 4/69 (5.8)   |         |
| 4–7                                                                                        | 24/28 (85.7)      | 34/46 (73.9) | 18/42 (42.9) | 48/69 (69.6) |         |
| > 7                                                                                        | 2/28 (7.1)        | 11/46 (23.9) | 20/42 (47.6) | 17/69 (24.6) |         |
| Need for bowel rest in uncomplicated diverticulitis (n = 190)                              |                   |              |              |              | 0.803   |
| Yes                                                                                        | 17/28 (60.7)      | 26/50 (52.0) | 23/42 (54.8) | 35/70 (50.0) |         |
| No                                                                                         | 11/28 (39.3)      | 24/50 (48.0) | 19/42 (45.2) | 35/70 (50.0) |         |
| Need for emergency surgery in diverticulitis with an abscess or microperforation (n = 189) |                   |              |              |              | 0.045   |
| Yes                                                                                        | 5/28 (17.9)       | 3/49 (6.1)   | 0/42 (0.0)   | 6/70 (8.6)   |         |
| No                                                                                         | 23/28 (82.1)      | 46/49 (93.9) | 42/42 (100)  | 64/70 (91.4) |         |
| Treatment for recurrent disease (n = 185)                                                  |                   |              |              |              | 0.060   |
| Favor repeated medical treatment                                                           | 2/28 (7.1)        | 16/47 (34.0) | 7/42 (16.7)  | 17/68 (25.0) |         |
| Favor surgical treatment                                                                   | 0/28 (0.0)        | 2/47 (4.3)   | 4/42 (9.5)   | 5/68 (7.4)   |         |
| Favor individualized                                                                       | 26/28 (92.9)      | 29/47 (61.7) | 31/42 (73.8) | 46/68 (67.6) |         |
| Elective surgery recommendation for third recurrence (n = 185)                             |                   |              |              |              | 0.433   |
| Yes                                                                                        | 9/28 (32.1)       | 15/47 (31.9) | 19/42 (45.2) | 21/68 (30.9) |         |
| No                                                                                         | 19/28 (67.9)      | 32/47 (68.1) | 23/42 (54.8) | 47/68 (69.1) |         |
| Elective surgery recommendation for fourth recurrence (n = 185)                            |                   |              |              |              | 0.907   |
| Yes                                                                                        | 19/28 (67.9)      | 29/47 (61.7) | 27/42 (64.3) | 41/68 (60.3) |         |
| No                                                                                         | 9/28 (32.1)       | 18/47 (38.3) | 15/42 (35.7) | 27/68 (39.7) |         |

Values are presented with number of responses per total number of respondents (%).
